# Supplementary material for: A Structural Principle for Macroscopic Neural Dynamics Correlations
Source: Research Square preprint supplement (doi:10.21203/rs.3.rs-8297673/v1), 2026-01-07
Supplement: Supplementary file 1 [file 991a4ac0be96904625a60ddc.pdf]

1  
2  
3  
  
4  
5  
6  
7  
8  
9  
10  
11  
12  
13  
14  
15  
16  
17

Supplementary information:  
A Structural Principle for Macroscopic Neural Dynamics  
Correlations

**Contents**

|          |                                                                                                                         |           |
|----------|-------------------------------------------------------------------------------------------------------------------------|-----------|
| <b>1</b> | <b>Details of theoretical analysis</b>                                                                                  | <b>2</b>  |
| 1.1      | Calculation of the generating functional $Z_{\mathbf{J}}$ and averaged generating functional $\bar{Z}$ . . . . .        | 2         |
| 1.2      | Derivation of the DMFT equations via saddle-point approximation . .                                                     | 5         |
| <b>2</b> | <b>The bulk spectrum of the sample correlation matrix of Gaussian random matrix</b>                                     | <b>7</b>  |
| <b>3</b> | <b>Numerical simulation of the condition for size-invariant correlation magnitude</b>                                   | <b>8</b>  |
| <b>4</b> | <b>The relationship between <math>c_{ij}^J</math> and <math>c_{ij}^x</math> under different spectral distributions</b>  | <b>9</b>  |
| <b>5</b> | <b>The relationship between <math>\lambda_i</math> and <math>\sigma_i</math> under different spectral distributions</b> | <b>10</b> |
| <b>6</b> | <b>Normalization of constructed correlation matrix</b>                                                                  | <b>12</b> |

# 18 1 Details of theoretical analysis

19 As is mentioned in the **Methods** part of the main text, our theoretical analysis can  
 20 be divided into three steps: 1) calculating the generating functional of the dynamical  
 21 process with the path integral method, 2) deriving the dynamical mean-field theory  
 22 equations from the generating functional via saddle-point approximation, and 3) ana-  
 23 lyzing the dynamical properties from the DMFT equations. Here we present additional  
 24 details for the previous two steps.

## 25 1.1 Calculation of the generating functional $Z_{\mathbf{J}}$ and averaged 26 generating functional $\bar{Z}$

27 The derivation started from the generating functional  $Z_{\mathbf{J}}$  of dynamical process for  
 28 a given coupling matrix  $\mathbf{J}$ , which provided a thorough description of the dynamical  
 29 properties. Then,  $\bar{Z}$  is calculated as the averaged generating functional over the ran-  
 30 dom realizations of the coupling matrix. Unlike  $Z_{\mathbf{J}}$  that is affected by the specific  
 31 realization of the coupling matrix,  $\bar{Z}$  will reveal the dynamical properties that only  
 32 depend on the structural statistics of  $\mathbf{J}$  (e.g., coupling correlation). Here, unlike the  
 33 conventional random neural networks that only considered the expectation and vari-  
 34 ance of the coupling matrix elements, we introduced the coupling correlation that is  
 35 the second-order mixed moment that reads  $E(J_{ik}J_{jk}) = r_{ij}^J \sigma_J^2$ . As the coupling corre-  
 36 lation remain invariant across random network realizations, the averaged generating  
 37 functional  $\bar{Z}$  is expected to reveal how this network statistics shapes the dynamics.

38 We discretized the systems described by equation (1) in the main text while adding  
 39 the perturbation field  $j_i(t)$ :

$$\frac{dx_i(t)}{dt} = -x_i(t) + \sum_j J_{ij} \phi[x_j(t)] + s_i(t) + j_i(t), \quad (\text{S1})$$

40 by dividing the time intervals of interest  $[t_0, t]$  into  $n_T$  segments of length  $\delta t$  such that  
 41  $n_T \delta t = t - t_0$ :

$$x_i^{a+1} - x_i^a = -x_i^a \delta t + \sum_{j=1}^N J_{ij} \phi_j^a \delta t + s_i^a \delta t + j_i^a \delta t + x_i^0 \delta_{a0}^{Kr}. \quad (\text{S2})$$

42 Here  $\phi_j^a$  is the abbreviation of  $\phi[x_j(t_a)]$ , and  $\delta_{a0}^{Kr}$  is the Kronecker delta that sets the  
 43 initial condition at  $t_0$  to be  $x_i^0$ . The discretization allows for a convenient expression  
 44 of the probability density of the dynamical path  $\{x_i^a\}_{t_a \in [t_0, t]}$  under the constraint of  
 45 equation (1), which is given by

$$P[x_i^a]_{\mathbf{J}} = \int p(s_i^a) ds_i^a \delta[x_i^{a+1} - x_i^a + (x_i^a - \sum_j J_{ij} \phi_j^a) \delta t - s_i^a \delta t - j_i^a \delta t - x_i^0 \delta_{a0}^{Kr}] \quad (\text{S3})$$

46 where the Dirac  $\delta$  function indicates that the dynamics of a unit  $i$  at time  $t_a$  takes  
 47 the probability density of 1 if it satisfies the differential equation, and 0 other wise.

48 The subscript  $\mathbf{J}$  indicates that the probability density is a function of the specific  
 49 realization of the coupling matrix  $\mathbf{J}$ . Then, probability density of the whole dynamical  
 50 path is calculated as the product of different units at different time points, with  
 51  $P[x]_{\mathbf{J}} = \prod_{i,a} P[x_i^a]_{\mathbf{J}}$ . The Fourier representation of the  $\delta$ -function yields

$$P[x]_{\mathbf{J}} = \int \prod_{i,a} \frac{d\hat{h}_i^a}{2\pi} \exp\{-i\hat{x}_i^a[x_i^{a+1} - x_i^a + (x_i^a - \sum_j J_{ij}\phi_j^a)\delta t - \frac{\sigma_s^2}{2}i\hat{x}_i^a\delta t - j_i^a\delta t - x_i^0\delta_{a0}^{Kr}]\}, \quad (\text{S4})$$

52 where the conjugate variable  $\hat{x}_i$  is naturally introduced. Therefore, the generating  
 53 functional reads

$$\begin{aligned} Z[j, \hat{j}]_{\mathbf{J}} &= \int \prod_{i,a} dx_i^a P[x_i^a]_{\mathbf{J}} \exp\{-ix_i^a \hat{j}_i^a\} \\ &= \int \prod_{i,a} \frac{dx_i^a d\hat{x}_i^a}{2\pi} \exp\{-i\hat{x}_i^a[\frac{x_i^{a+1} - x_i^a}{\delta t} + x_i^a - \sum_j J_{ij}\phi_j^a - \frac{\sigma_s^2}{2}i\hat{x}_i^a - j_i^a - \frac{x_i^0\delta_{a0}^{Kr}}{\delta t}]\delta t \\ &\quad + (i\hat{x}_i^a j_i^a + ix_i^a \hat{j}_i^a)\delta t\}. \end{aligned}$$

54 Then, taking the continuum limit  $n_T \rightarrow \infty$ , we got the generating functional  
 55  $Z[j, \hat{j}]_{\mathbf{J}}$  for continuous systems as the integral over all possible paths of  $x_i$  and  $\hat{x}_i$  as  
 56 in equation (2) in the main text:

$$Z[j, \hat{j}]_{\mathbf{J}} = \int \prod_i Dx_i D\hat{x}_i \exp\{-\sum_i S[x_i, \hat{x}_i] + \sum_{i,a} (i\hat{x}_i^a j_i^a + ix_i^a \hat{j}_i^a)\}, \quad (\text{S5})$$

57 with the functional integral measure defined as  $Dx_i \equiv \lim_{n_T \rightarrow \infty} \prod_a dx_i^a$  and  $D\hat{x}_i \equiv$   
 58  $\lim_{n_T \rightarrow \infty} \prod_a \frac{d\hat{x}_i^a}{2\pi}$ .

59 The averaged generating functional  $\bar{Z}[s, \hat{s}]$  is then calculated as

$$\begin{aligned} \bar{Z}[j, \hat{j}] &= E(Z[j, \hat{j}]_{\mathbf{J}}) \\ &= \int \prod_i Dx_i D\hat{x}_i E(\exp\{-\sum_i S[x_i, \hat{x}_i]\}) \exp\{\sum_{i,a} (i\hat{x}_i^a j_i^a + ix_i^a \hat{j}_i^a)\}. \end{aligned} \quad (\text{S6})$$

60 Since  $S[x_i, \hat{x}_i] = \sum_a i\hat{x}_i^a(\dot{x}_i^a + x_i^a - \sum_j J_{ij}\phi_j^a - \frac{\sigma_s^2}{2}i\hat{x}_i^a - x_i^0\delta_{a0})$ , the above step is  
 61 essentially a calculation of the average of  $\exp\{\sum_{i,j} J_{ij}i\hat{x}_i^a\phi_j^a\}$  over random realizations  
 62 of the coupling matrix  $\mathbf{J}$ . Given the multivariate Gaussian distribution of  $J_{ij}$ , the  
 63 result reads

$$\begin{aligned}
E(\exp\{\sum_{i,j} J_{ij} \hat{x}_i^a \phi_j^a\}) &= \exp\{\sum_{i,j} \frac{\sigma_J^2}{2} (\sum_a \hat{x}_i^a \phi_j^a)^2\} \times \\
&\times \exp\{\sum_{i \neq j} \sum_k \frac{r_{ij}^J \sigma_J^2}{2} (\sum_a \hat{x}_i^a \phi_k^a) (\sum_b \hat{x}_j^b \phi_k^b)\}, \quad (S7)
\end{aligned}$$

By interchanging the order of summation, we got

$$\begin{aligned}
E(\exp\{\sum_{i,j} J_{ij} \hat{x}_i^a \phi_j^a\}) &= \exp\{\frac{\sigma_J^2}{2} \sum_{a,b} (\sum_i \hat{x}_i^a \hat{x}_i^b) (\sum_j \phi_j^a \phi_j^b) \\
&+ \frac{\sigma_J^2}{2} \sum_{a,b} (\sum_{i \neq j} r_{ij}^J \hat{x}_i^a \hat{x}_j^b) (\sum_k \phi_k^a \phi_k^b)\} \quad (S8)
\end{aligned}$$

To simplify the non-local interaction term, we introduced the following change of variables  $\hat{\mathbf{x}}^{\mathbf{a}} = \mathbf{Q} \hat{\mathbf{y}}^{\mathbf{a}}$ ,  $\mathbf{x}^{\mathbf{a}} = \mathbf{Q} \mathbf{y}^{\mathbf{a}}$ ,  $\hat{\mathbf{j}}^{\mathbf{a}} = \mathbf{Q} \hat{\mathbf{l}}^{\mathbf{a}}$  and  $\mathbf{j}^{\mathbf{a}} = \mathbf{Q} \mathbf{l}^{\mathbf{a}}$ , which leads to

$$\sum_i \hat{x}_i^a \hat{x}_i^b = \sum_i \hat{y}_i^a \hat{y}_i^b, \quad (S9)$$

$$\sum_{i \neq j} r_{ij}^J \hat{x}_i^a \hat{x}_j^b = \sum_i (\lambda_i - 1) \hat{y}_i^a \hat{y}_i^b, \quad (S10)$$

$$\sum_{i,a} \hat{x}_i^a (\hat{x}_i^a + x_i^a - x_i^0 \delta_{a0}) = \sum_{i,a} \hat{y}_i^a (\hat{y}_i^a + y_i^a - y_i^0 \delta_{a0}), \quad (S11)$$

$$\sum_{i,a} (\hat{x}_i^a j_i^a + \hat{x}_i^a \hat{j}_i^a) = \sum_{i,a} (\hat{y}_i^a l_i^a + \hat{y}_i^a \hat{l}_i^a), \quad (S12)$$

where the columns of  $\mathbf{Q}$  are the eigenvectors of the coupling correlation matrix, and  $\lambda_i$  is the  $i$ -th eigenvalue. The generating functional of the latent system can be calculated from equation (3) in the main text following the above procedure, or alternatively by substituting the latent variables into the expression of  $\bar{Z}[j, \hat{j}]$  for the original system. Here, we show the latter approach, substituting equations (S9-S12) into equation (S6) so that the averaged generating functional is expressed as

$$\begin{aligned}
\bar{Z}[l, \hat{l}] &= \int |\mathbf{Q}|^2 \prod_i \mathrm{D}y_i \mathrm{D}\hat{y}_i \exp[-\sum_{i,a} \hat{y}_i^a (\hat{y}_i^a + y_i^a - \frac{\sigma_s^2}{2} \hat{y}_i^a - y_i^0 \delta_{a0}) \\
&+ \frac{\sigma_J^2}{2} \sum_{a,b} (\sum_i \lambda_i \hat{y}_i^a \hat{y}_i^b) (\sum_j \phi_j^a \phi_j^b) \\
&+ \sum_{i,a} (\hat{y}_i^a l_i^a + \hat{y}_i^a \hat{l}_i^a)] \quad (S13)
\end{aligned}$$



74 that yields equation (5) in the main text:

$$\bar{Z}[l, \hat{l}] = \int |\mathbf{Q}|^2 \prod_i Dy_i D\hat{y}_i \exp\left\{-\sum_i F[y_i, \hat{y}_i] + \sum_{i,a} (\hat{y}_i^a l_i^a + i y_i^a \hat{l}_i^a)\right\}. \quad (\text{S14})$$

## 75 1.2 Derivation of the DMFT equations via saddle-point 76 approximation

77 We then employed the equality  $C^{ab} \equiv \frac{1}{N} \sum_i \phi_i^a \phi_i^b$  to simplify  $\bar{Z}[l, \hat{l}]$  by using the  
78 Hubbard-Stratonovich transformation

$$1 = \int dC^{ab} (d\hat{C}^{ab}/2\pi) \exp[-i\hat{C}^{ab}(C^{ab} - \sum_i \phi_i^a \phi_i^b/N)]. \quad (\text{S15})$$

79 As a result, Eq. 5 is transformed into

$$\bar{Z}[l, \hat{l}] = \int DCD\hat{C} e^{NU[C, \hat{C}; l, \hat{l}]}, \quad (\text{S16})$$

80 with

$$NU[C, \hat{C}; l, \hat{l}] = \frac{N}{2} \sum_{ab} i\hat{C}^{ab} C^{ab} + NV[C, \hat{C}; l, \hat{l}], \quad (\text{S17})$$

$$NV[C, \hat{C}; l, \hat{l}] = \ln \left\{ \int \prod_i Dy_i D\hat{y}_i e^{\sum_i W[y_i, \hat{y}_i; C, \hat{C}]} \times \right. \\ \left. \times e^{\sum_i \sum_a (i\hat{y}_i^a l_i^a + i y_i^a \hat{l}_i^a)} \right\}, \quad (\text{S18})$$

81 and

$$W[y_i, \hat{y}_i; C, \hat{C}] = \sum_a i\hat{y}_i^a (y_i^a + y_i^a - \frac{\sigma_s^2}{2} i\hat{y}_i^a - y_i^0 \delta_{a0}) \\ - \frac{1}{2} \sum_{a,b} [i\hat{C}^{ab} \phi_i^a \phi_i^b + \lambda_i C^{ab} i\hat{y}_i^a i\hat{y}_i^b] \quad (\text{S19})$$

82 In the thermodynamic limit ( $N \gg 1$ ), the saddle-point approximation ensures that

$$\bar{Z}[l, \hat{l}] \approx \bar{Z}_0[l, \hat{l}] = e^{NU[C_0, \hat{C}_0; l, \hat{l}]} \quad (\text{S20})$$

83 due to the exponential decay of the value of  $e^{NU[C, \hat{C}; l, \hat{l}]}$  away from  $e^{NU[C_0, \hat{C}_0; l, \hat{l}]}$  mag-  
84 nified by large  $N$ , where  $U[C_0, \hat{C}_0; l, \hat{l}]$  in the exponent is the value of  $U$  at the point  
85  $C_0^{ab} = 1/N \sum_i \langle \phi_i^a \phi_i^b \rangle$ ,  $\hat{C}_0^{ab} = 1/N \sum_i \langle i\hat{y}_i^a i\hat{y}_i^b \rangle$  that satisfies

$$\frac{\partial}{\partial C} U[C_0, \hat{C}_0; l, \hat{l}]|_{C=C_0, \hat{C}=\hat{C}_0} = 0,$$

$$\frac{\partial}{\partial \hat{C}} U[C_0, \hat{C}_0; l, \hat{l}]|_{C=C_0, \hat{C}=\hat{C}_0} = 0. \quad (\text{S21})$$

Due to the normalization condition  $\bar{Z}[l, \hat{l} = 0] = \bar{Z}[j, \hat{j} = 0] = 1$ , and the correlation functions that involve only  $\hat{y}$  can be calculated as the derivative of  $\bar{Z}[l, 0]$  over  $l$ ,  $\hat{C}_0^{ab} = 1/N \sum_i \langle i\hat{y}_i^a i\hat{y}_i^b \rangle_0$  must vanish to 0. Therefore, we have the value of  $NU[C_0, \hat{C}_0; l, \hat{l}]$  as

$$NU[C_0, \hat{C}_0; l, \hat{l}] = \ln \left\{ \prod_i \int Dy_i D\hat{y}_i e^{W[y_i, \hat{y}_i; C_0, 0] + \sum_a (i\hat{y}_i^a l_i^a + i y_i^a \hat{l}_i^a)} \right\} \quad (\text{S22})$$

$\bar{Z}_0[l, \hat{l}]$ , as the approximation of the averaged generating functional of the dynamics of the whole system, can be subsequently viewed as the product of  $N$  individual generating functionals of single-site dynamics:

$$\bar{Z}_0[l, \hat{l}] = \prod_i Z_i[l, \hat{l}], \quad (\text{S23})$$

where

$$Z_i[l, \hat{l}] = \int Dy_i D\hat{y}_i e^{W[y_i, \hat{y}_i; C_0, 0] + \sum_a (i\hat{y}_i^a l_i^a + i y_i^a \hat{l}_i^a)} \quad (\text{S24})$$

.

Based on the equality

$$\exp \left[ \sum_{a,b} \lambda_i C_0^{ab} i\hat{y}_i^a i\hat{y}_i^b \right] = \langle \exp \left[ \sum_a \lambda_i^{1/2} i\hat{y}_i^a \gamma^{*a} \right] \rangle_t \quad (\text{S25})$$

where  $\gamma^*$  is a Gaussian white noise with  $\langle \gamma^{*a} \gamma^{*b} \rangle_t = g^2 C_0^{ab}$ , we notice that

$$Z_i[l, \hat{l}] = \left\langle \int Dy_i D\hat{y}_i e^{\sum_a i\hat{y}_i^a (\dot{y}_i^a + y_i^a - \lambda_i^{1/2} \gamma^{*a} - \frac{\sigma_s^2}{2} i\hat{y}_i^a - y_i^0 \delta_{a0})} \times e^{\sum_a (i\hat{y}_i^a l_i^a + i y_i^a \hat{l}_i^a)} \right\rangle_{\varepsilon_i}. \quad (\text{S26})$$

This indicates  $Z_i[l, \hat{l}]$  is the generating functional of the stochastic process

$$\frac{dy_i}{dt} = -y_i(t) + \hat{s}_i(t) + \lambda_i^{1/2} \gamma^*(t) + l_i(t), \quad (\text{S27})$$

where  $\hat{s}_i(t)$  is the external drive,  $\lambda_i^{1/2} \gamma^*(t)$  is the mean-field term representing the internal interactions, and  $l_i(t)$  is the perturbation field used for DMFT derivation.

Finally, a linear transformation of the mean-field equations for latent dynamics yields the DMFT equations for the original dynamics  $x$  as equation (7) in the main text:

$$\frac{dx_i}{dt} = -x_i + s_i(t) + \eta_i^*(t) + j_i(t) \quad (\text{S28})$$

with the Gaussian white noise field  $\eta_i^* = \sum_k Q_{ik} \lambda_k^{1/2} \gamma_k^*$ . The perturbation field  $j_i(t)$  is then taken as zero in the following part.

## 2 The bulk spectrum of the sample correlation matrix of Gaussian random matrix

When simulating the dynamics of correlated random neural networks in the main analysis, we construct the coupling correlation matrix as the sample correlation of a Gaussian random matrix. In random matrix theory, such a matrix corresponds to a (normalized) Wishart matrix, whose eigenvalue spectrum follows the Marchenko–Pastur distribution in the large- $N$  limit. The Marchenko–Pastur distribution has a characteristic bounded support, with the eigenvalue density being nonzero only within a finite interval  $[\lambda_-, \lambda_+]$  and vanishing outside this range. The probability density  $f(x)$  of the eigenvalue reads

$$f(x) = \frac{\sqrt{(\lambda_+ - x)(x - \lambda_-)}}{2\pi\sigma_J^2\lambda x} \quad (\text{S29})$$

for  $\lambda_- \leq x \leq \lambda_+$ , and  $f(x) = 0$  otherwise. When  $\mathbf{C}$  is the sample correlation matrix of  $N \times N$  square matrix  $\mathbf{J}$ , we have  $\lambda = \frac{N}{N} = 1$  with  $\lambda_{\pm} = \sigma_J^2(1 \pm \sqrt{\lambda})^2$  (Supplementary Fig.1).

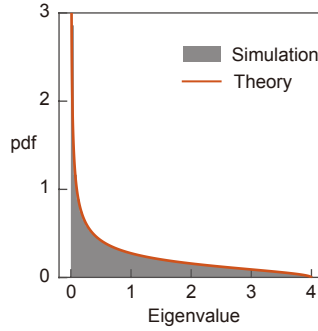

**Supplementary Fig. 1 The bulk spectral distribution of the sample correlation matrix of Gaussian random matrix.** The gray histogram is the distribution of eigenvalues of simulated sample correlation matrices, and the red line is the theoretical Marchenko-Pastur distribution. Notably, the distribution is bulk-like, with eigenvalues bounded between  $\lambda_- = 0$  and  $\lambda_+ = 4$  ( $\sigma_J = 1$ )

### 3 Numerical simulation of the condition for size-invariant correlation magnitude

We consider the spectra that follow Log-normal distribution controlled by a dispersion parameter  $\sigma_\lambda$ . The detailed simulation procedure is provided in **Methods**, and is visualized here step-by-step to enhance clarity. The goal is to learn how the dispersion parameter  $\sigma_\lambda$  must scale with system size  $N$  to ensure coupling correlation scale  $\sigma_R$  remains size-invariant (**Supplementary Fig.2**).

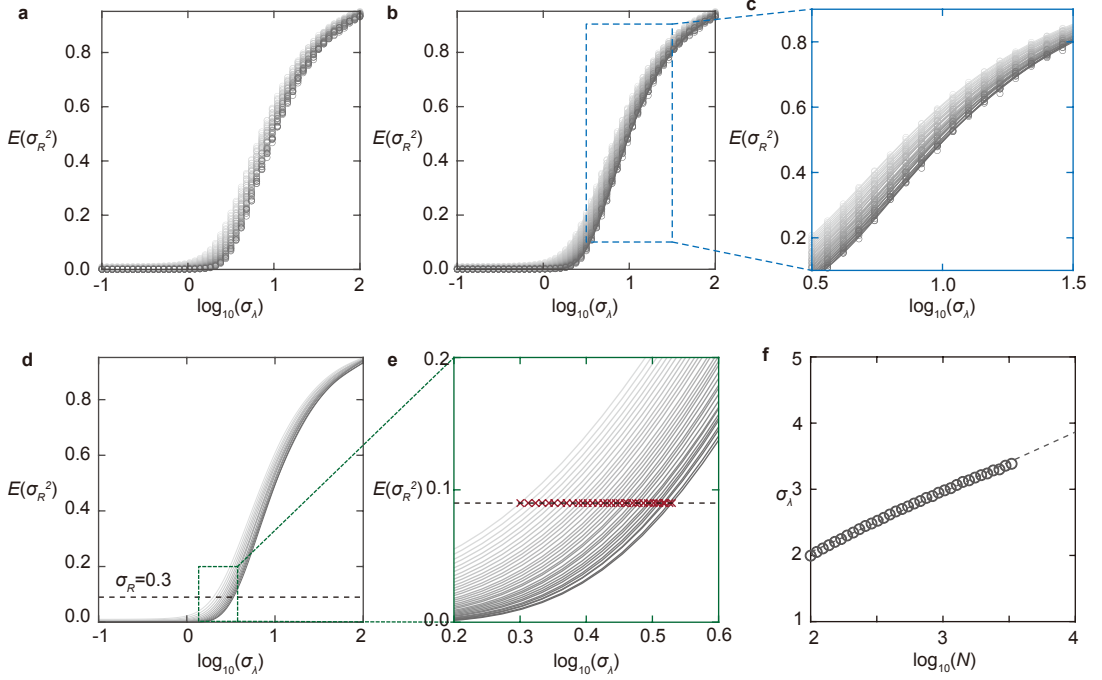

**Supplementary Fig. 2 Numerical simulation of the condition for size-invariant correlation magnitude.** **a**, Dependence of the coupling correlation scale  $\sigma_R$  on the dispersion parameter  $\sigma_\lambda$ , with darker colors indicating larger system sizes (ranging from  $N = 100$  to  $3301$ ). Each point represents the mean  $\sigma_R^2$  averaged over multiple random coupling matrix realizations. **b**, Smoothing spline fits (lines) to the  $\sigma_R$ - $\sigma_\lambda$  relationship for each  $N$  (circles with the same color). **c**, A detailed view confirming the accuracy of the fits. **d**, Inverse mapping from a target  $\sigma_R = 0.3$  (dashed line, corresponding to  $\mathbb{E}[\sigma_R^2] = 0.09$ ) to the required  $\sigma_\lambda$  for each  $N$ . **e**, Close-up of the intersections (red crosses) indicating the  $\sigma_\lambda$  value for each system size. **f**, The resulting scaling of  $\sigma_\lambda$  with  $N$ .

## 4 The relationship between $c_{ij}^J$ and $c_{ij}^x$ under different spectral distributions

Our numerical simulations reveal a consistent relationship between coupling and dynamical correlation that is largely independent of the specific spectral distribution: it remains precisely linear under bulk-like distributions and approximately linear under long-tailed ones. This result not only validates the effectiveness of DMFT for bulk distributions but also indicates that a common origin may be responsible for its failure in long-tailed cases (**Supplementary Fig.3**).

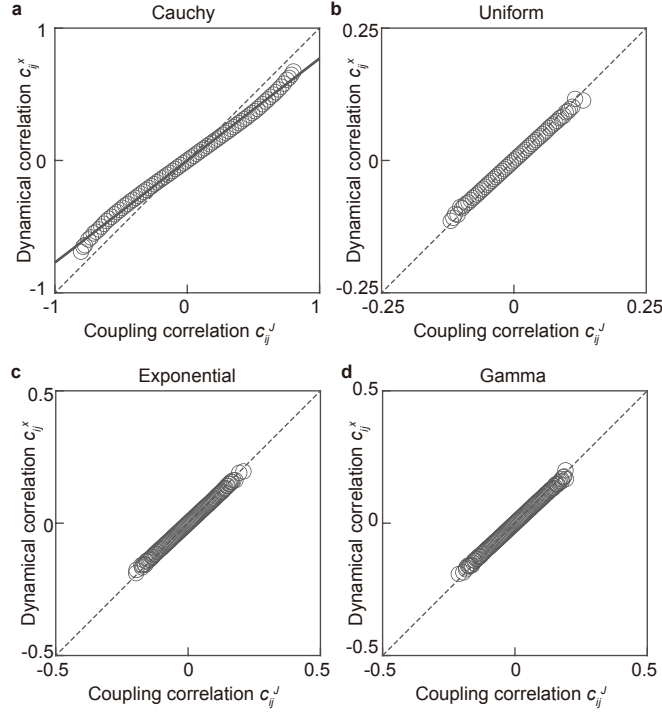

**Supplementary Fig. 3 The relationship between  $c_{ij}^J$  and  $c_{ij}^x$  under different spectral distributions.** a-d, The simulated relationship when the spectral distribution are Cauchy, Uniform, Exponential and Gamma, respectively. The Cauchy case closely matches the Log-normal results reported in the main text. On the other hand, the other three distributions exhibit a consistently linear relationship between  $c_{ij}^J$  and  $c_{ij}^x$ , despite variations in the magnitude of coupling correlation.

## 133 5 The relationship between $\lambda_i$ and $\sigma_i$ under different 134 spectral distributions

135 A key premise for establishing DMFT is that the latent dynamics  $y_i(t)$  experience  
136 homogeneous collective interaction  $\gamma_i(t)$ . This premise can be tested by examining  
137 whether the latent dynamics scale  $\sigma_i$  scales proportionally with the square root of  
138 corresponding eigenvalue  $\lambda_i$ . Simulations confirm that this proportionality holds for  
139 bulk-like spectral distributions but breaks down under long-tailed ones, thereby pro-  
140 viding a unified explanation for the domain of DMFT's validity (**Supplementary**  
141 **Fig.4**).

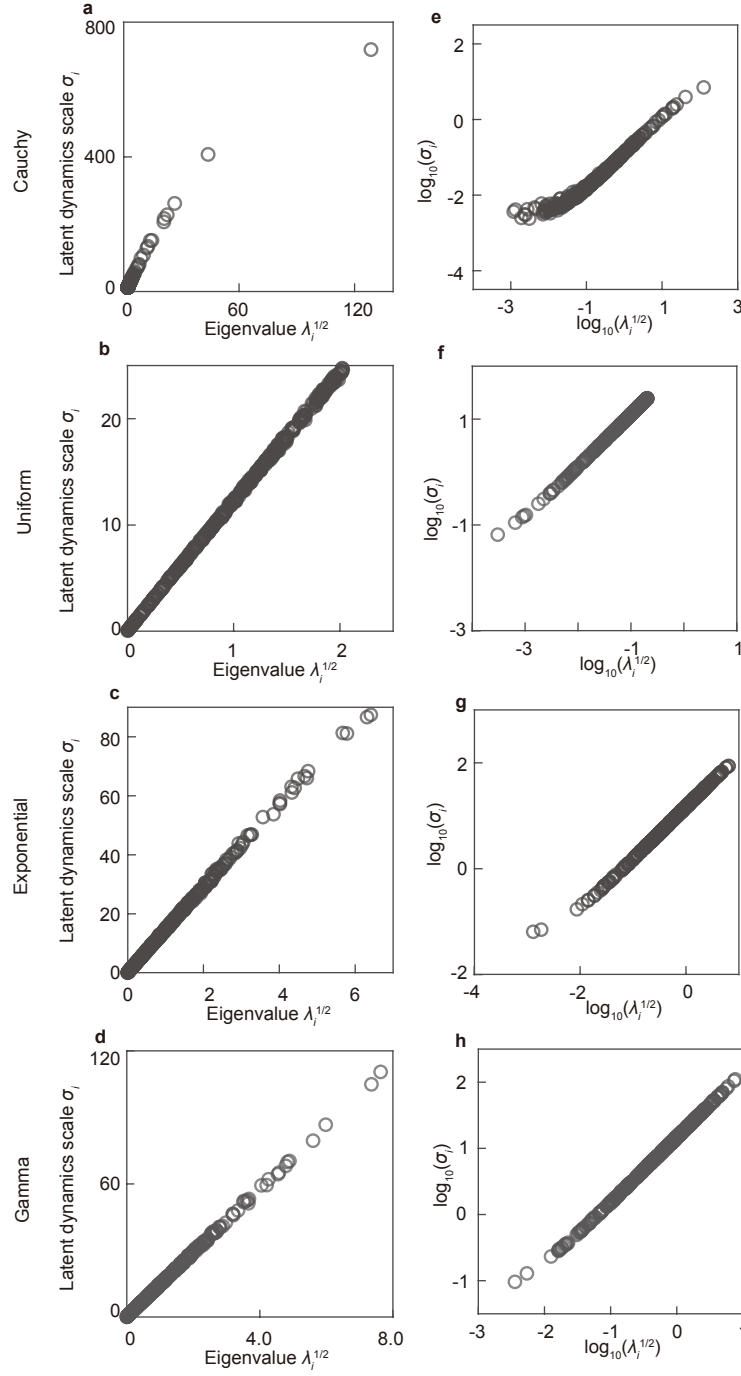

**Supplementary Fig. 4 The relationship between  $\lambda_i$  and  $\sigma_i$  under different spectral distributions.** The left panels (a–d) show the relationship between the latent dynamics scale  $\sigma_i$  ( $y$ -axis) and the corresponding eigenvalue square root  $\lambda_i^{1/2}$  ( $x$ -axis) for the Cauchy, uniform, exponential, and gamma distributions, respectively. The right panels (e–h) present the same relationships on a log–log scale.

## 142 6 Normalization of constructed correlation matrix

143 When constructing the coupling correlation matrix via the spectral decomposition  
144 approach, we apply a normalization step  $\mathbf{C} = \mathbf{D}^{-1/2} \mathbf{C}_0 \mathbf{D}^{-1/2}$ , where  $\mathbf{D} = \text{diag}(\mathbf{C}_0)$ ,  
145 and  $\mathbf{C}_0 = \mathbf{U}^{-1} \mathbf{\Lambda} \mathbf{U}$  is formed by directly combining randomly generated eigenvectors  
146  $\mathbf{U}$  and eigenvalues  $\mathbf{\Lambda}$ . Here, we demonstrate that the applied normalization has neg-  
147 ligible effect on the spectral density, as the eigenvalue probability density function  
148 remains fundamentally unaltered throughout the transformation (**Supplementary**  
149 **Fig.5**).



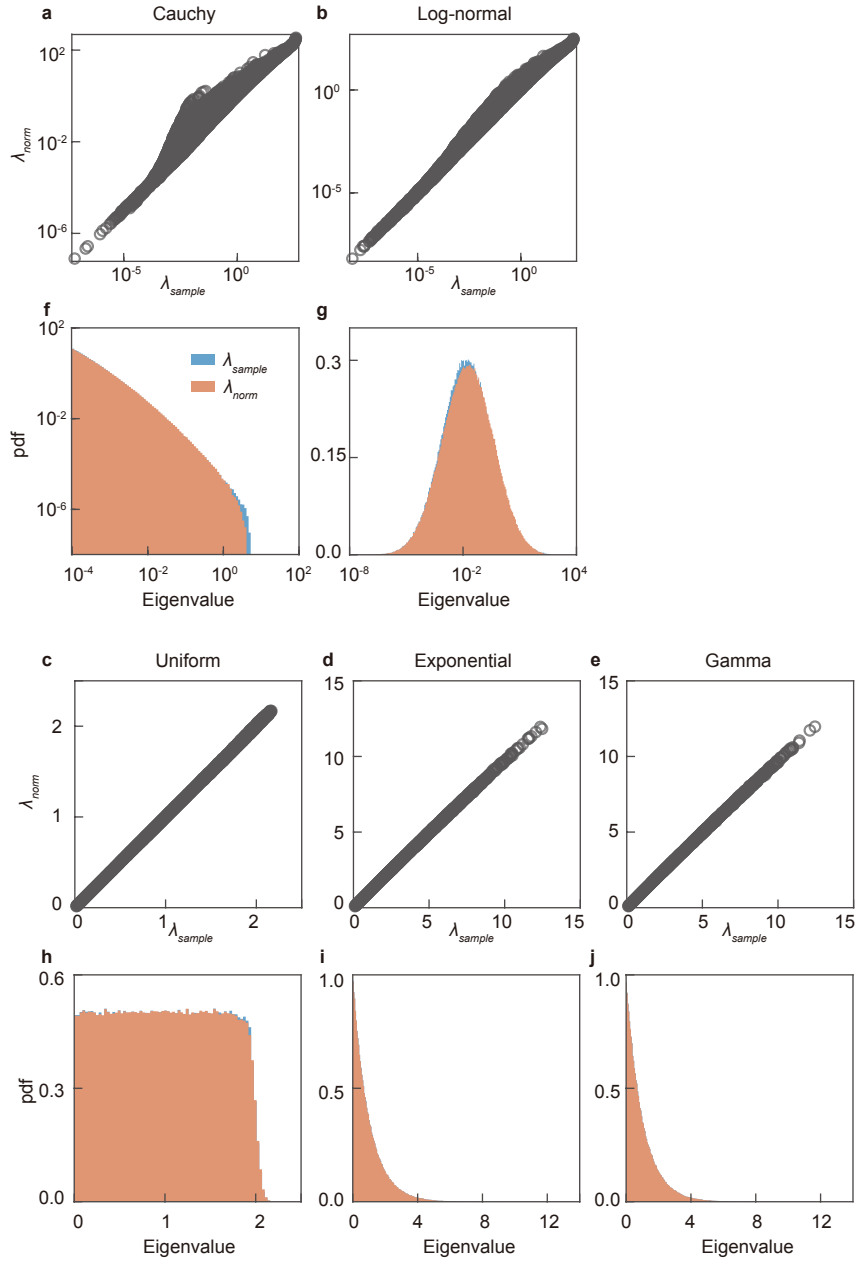

**Supplementary Fig. 5 The spectral distribution is conserved after normalization of coupling correlation matrix.** The upper panels (a–e) compare the initially sampled eigenvalues ( $\lambda_{\text{sample}}$ ) against their normalized counterparts ( $\lambda_{\text{norm}}$ ) for Cauchy, log-normal, uniform, exponential, and gamma spectral distributions, respectively. Although  $\lambda_{\text{norm}}$  occasionally deviates from  $\lambda_{\text{sample}}$ , particularly in the long-tailed cases (a,b), their relationship is well-approximated by the line  $y = x$ . The corresponding lower panels (f–j) display the probability distributions of both  $\lambda_{\text{sample}}$  and  $\lambda_{\text{norm}}$ .
